# Supplementary material for: The Logic of EGFR/ErbB Signaling: Theoretical Properties and Analysis of High-Throughput Data
Source: PubMed Central journal article supplement (PMC2710522; doi:10.1371/journal.pcbi.1000438), 2009-08-07

### Figure S3. Comparison of the discretized data with predictions from model M2.

**A** Primary human hepatocytes (data from Alexopoulos *et al*, in preparation).

**B** HepG2 cells (the horizontal line separates the the first (top) from the second (bottom) dataset for HepG2 cells; see also text).

Each row represents one treatment and the readouts are shown in the columns. Light green: predicted correctly, "on"; dark green: predicted correctly, "off"; light red: predicted "on", measured "off"; dark red: predicted "off", measured "on"; yellow: state cannot be determined in logical steady state analysis; black: data points where the measured species is inhibited are not considered.

**A**

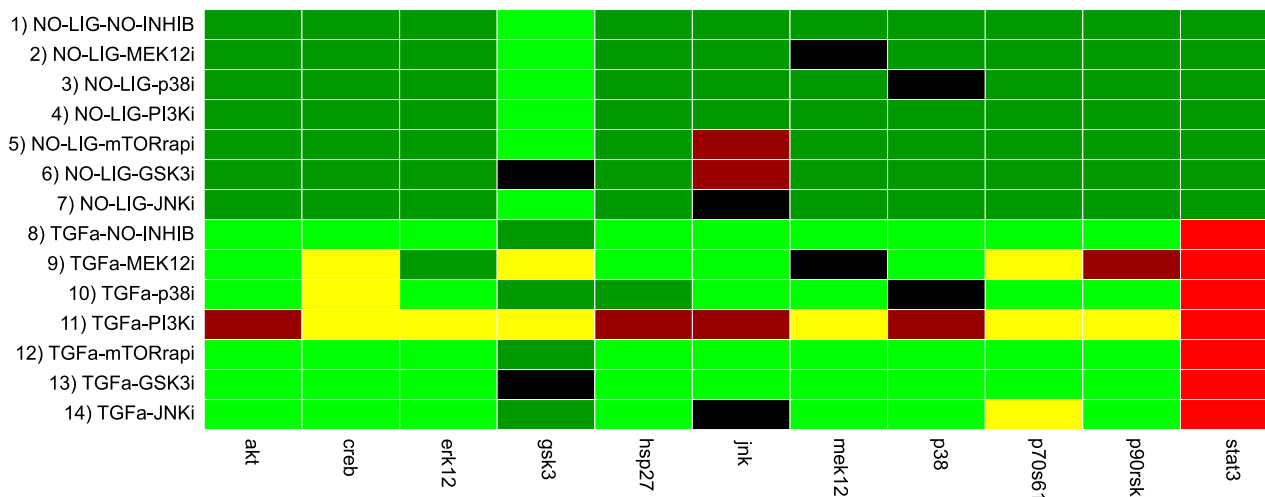

**B**

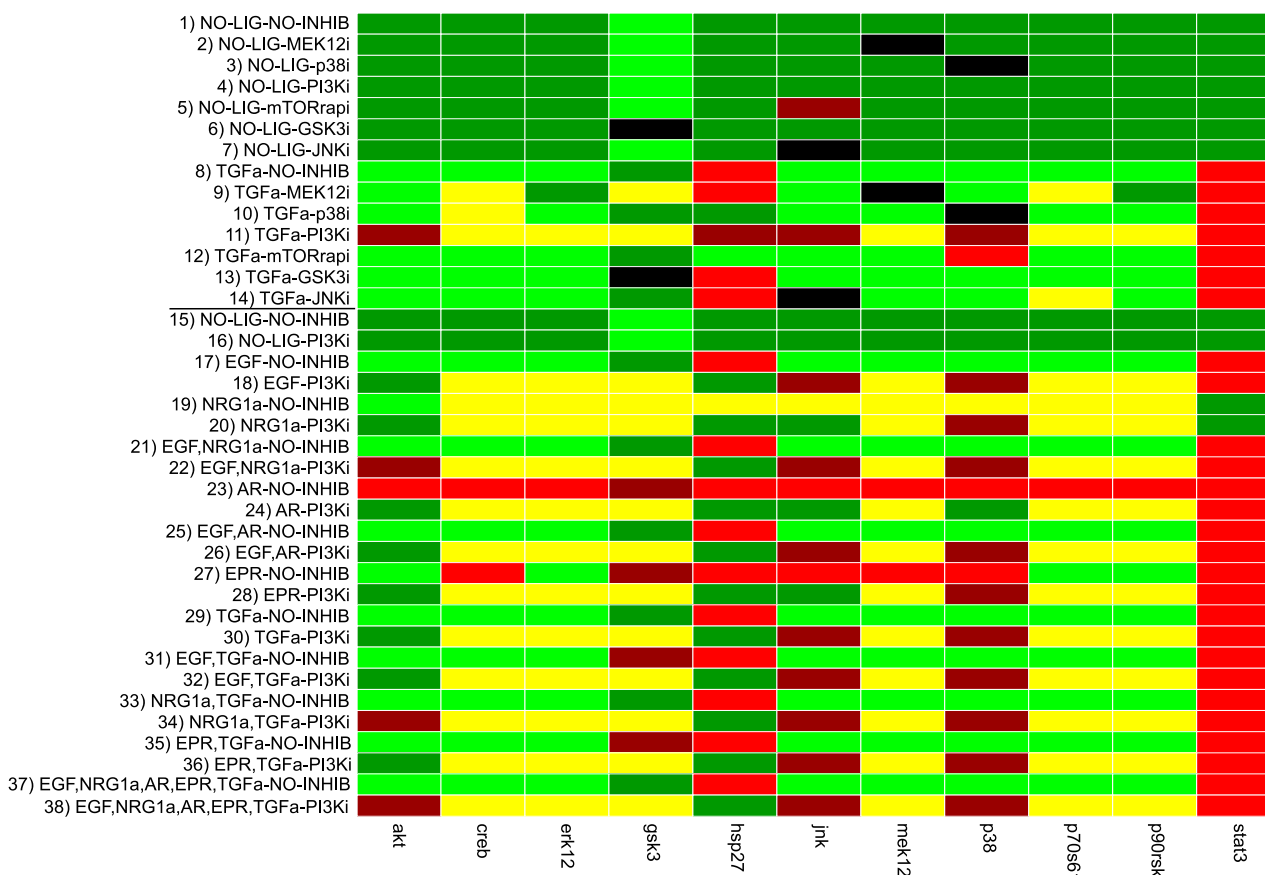

Supplement: pcbi.1000438.s003.pdf [file pcbi.1000438.s003.pdf]
