# Supplementary material for: The Logic of EGFR/ErbB Signaling: Theoretical Properties and Analysis of High-Throughput Data
Source: PubMed Central journal article supplement (PMC2710522; doi:10.1371/journal.pcbi.1000438), 2009-08-07

**Figure S4. Data plots generated with *DataRail*.**

Shown are the phosphorylation states of the proteins after 0, 30 and 180 minutes.

Green: significant activation after 30 minutes (according to the chosen parameters);

gray: no significant activation (cf. also Saez-Rodriguez *et al*, 2008).

**A** Primary human hepatocytes (data obtained from Alexopoulos *et al* (in preparation))

**B** HepG2 cells, first set of experiments (data obtained from Alexopoulos *et al* (in preparation))

**C** HepG2 cells, second set of experiments

**A**

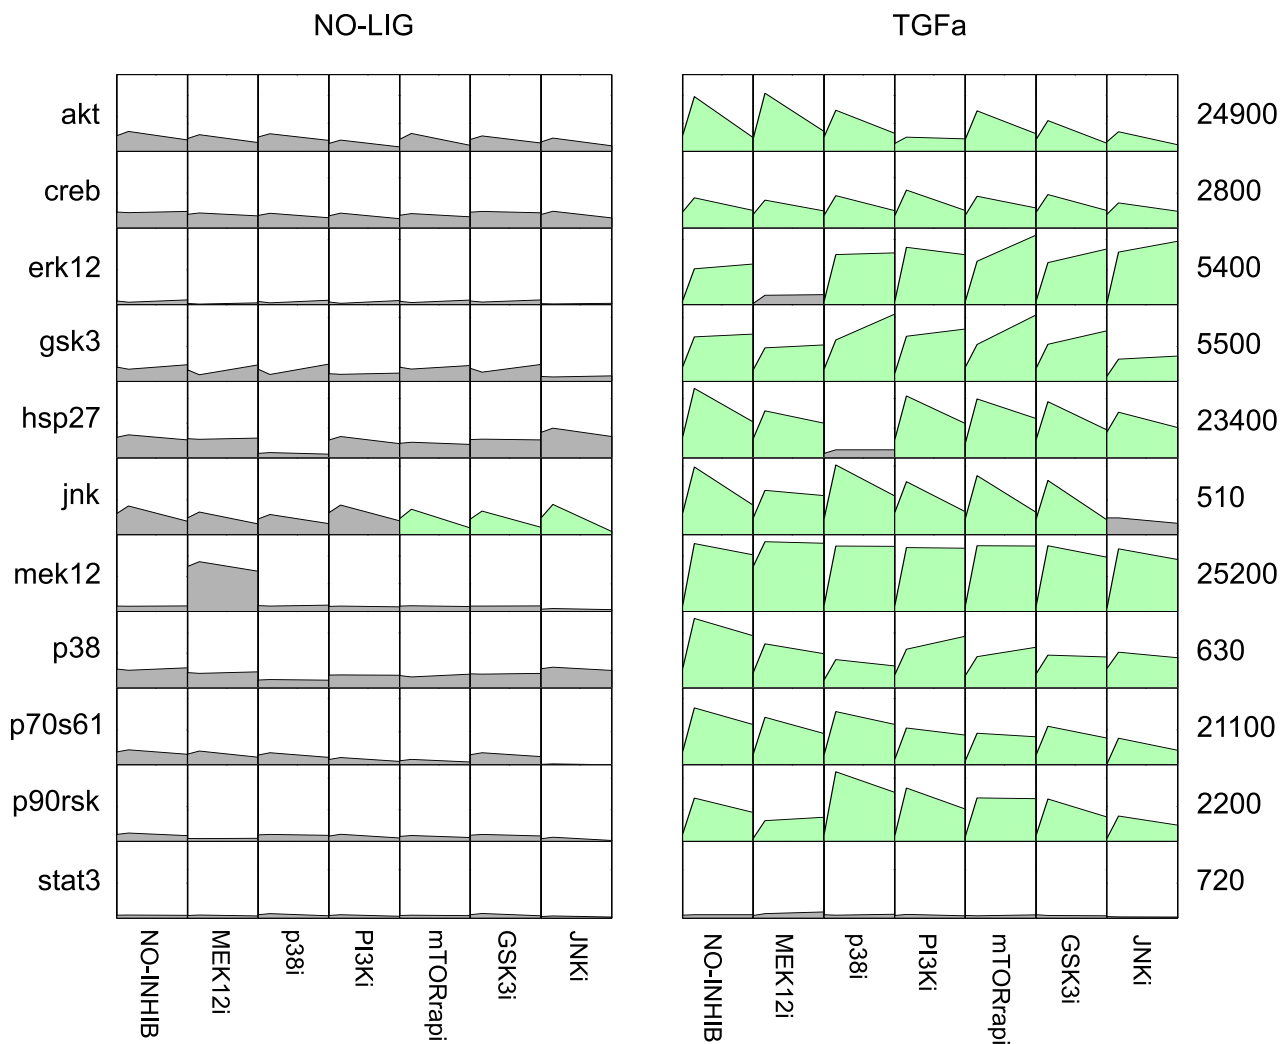



C

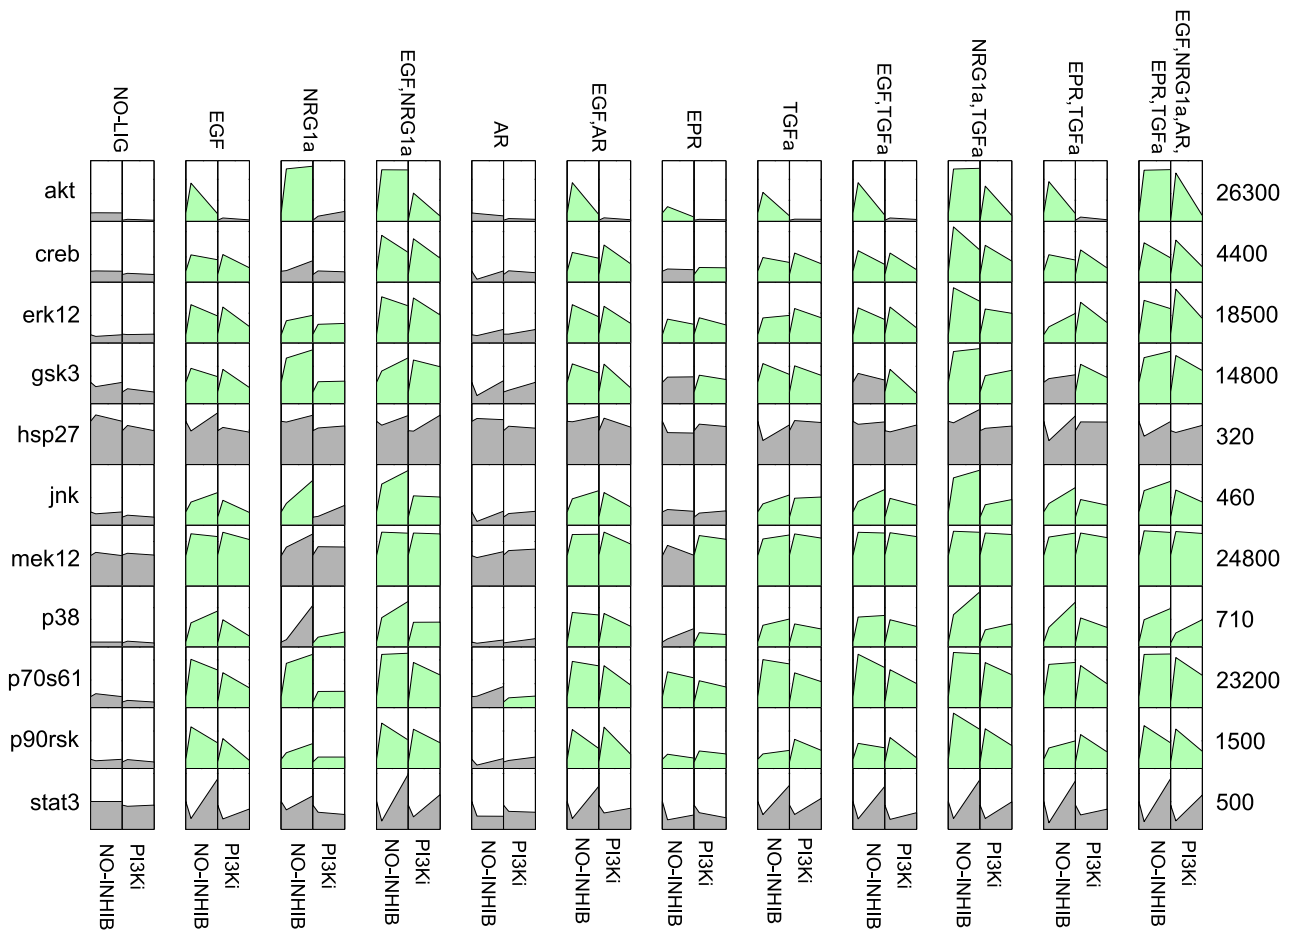

Supplement: pcbi.1000438.s004.pdf [file pcbi.1000438.s004.pdf]
