# Supplementary material for: The Logic of EGFR/ErbB Signaling: Theoretical Properties and Analysis of High-Throughput Data
Source: PubMed Central journal article supplement (PMC2710522; doi:10.1371/journal.pcbi.1000438), 2009-08-07
Supplement: pcbi.1000438.s006.pdf [file pcbi.1000438.s006.pdf]

**Table S2. Incomplete truth tables (ITTs) in model M2.**

All gates from model M1 (see Table S1.2) that point into nodes given in column 1 (nodes) are replaced by the interactions given in column 2. ITT gates are denoted with \*, AND gates with .

| <b>Nodes</b>                         | <b>interactions</b>                                                  |
|--------------------------------------|----------------------------------------------------------------------|
| endocyt_degrad                       | ccbl * rab5a → endocyt_degrad                                        |
| RN-tre                               | erbb11 * eps8r → rntre                                               |
| Rac/Cdc42                            | sos1_eps8_e3b1 * vav2 → rac_cdc42                                    |
| Raf1                                 | pak1 * csrc → pak1crscd<br>!akt · pak1crscd · ras → raf1             |
| p70s6 kinase (autoinhibitory domain) | jnk * erk → p70s6_1                                                  |
| CREB                                 | p90rsk * mk2 → creb                                                  |
| c-Fos                                | jnk * erk * p90rsk → jnkerkp90rskd<br>jnkerkp90rskd · !pp2a → cfos   |
| Sos1                                 | p90rsk * erk12 → p90rskerk12d<br>!p90rskerk12d · grb2 · sos1r → sos1 |
| MKK4                                 | mekk1 * mekk4 * mlk3 → mkk4                                          |
| p38                                  | mkk4 * mkk3 * mkk6 → p38                                             |
| Gsk3                                 | !akt * !p90rsk → gsk3                                                |
| BAD                                  | !akt * !pak1 → bad                                                   |
| PKC                                  | dag * ca → dagcad<br>dagcad · pdk1 → pkc                             |
| MEK1/2                               | raf1 * mekk1 → mek12                                                 |
