# Supplementary material for: The Logic of EGFR/ErbB Signaling: Theoretical Properties and Analysis of High-Throughput Data
Source: PubMed Central journal article supplement (PMC2710522; doi:10.1371/journal.pcbi.1000438), 2009-08-07
Supplement: pcbi.1000438.s007.pdf [file pcbi.1000438.s007.pdf]

**Table S3. Proposed model changes to improve the fit of the model to the data.**

**3.1. Proposed model changes for primary hepatocytes.**

| Interaction in Table S1.2                                                                         | Interaction             | Changed to                      |
|---------------------------------------------------------------------------------------------------|-------------------------|---------------------------------|
| 108                                                                                               | erbb11 · pip3 → vav2    | erbb11 → vav2                   |
| 109                                                                                               | erbb11 · pi34p2 → vav2  |                                 |
| 113                                                                                               | sos1eps8e3b1 → raccdc42 | removed                         |
| 116                                                                                               | erbb11 · csrc → stat3   | removed                         |
| 184                                                                                               | p90rsk → creb           | tgfa → creb (unknown mechanism) |
| 185                                                                                               | mk2 → creb              |                                 |
| 187                                                                                               | !p90rsk · !akt → gsk3   | !pkc → gsk3                     |
| <b>Additional interaction</b>                                                                     |                         |                                 |
| mtor_rap → p70s6_1 (excluded in logical analysis; in addition to reactions 143/144 in Table S1.2) |                         |                                 |

**3.2. Proposed model changes for HepG2.**

| Interaction in Table S1.2                                                                         | Interaction             | Changed to                      |
|---------------------------------------------------------------------------------------------------|-------------------------|---------------------------------|
| 108                                                                                               | erbb11 · pip3 → vav2    | erbb11 → vav2                   |
| 109                                                                                               | erbb11 · pi34p2 → vav2  |                                 |
| 113                                                                                               | sos1eps8e3b1 → raccdc42 | removed                         |
| 116                                                                                               | erbb11 · csrc → stat3   | removed                         |
| 181                                                                                               | mk2 → hsp27             | removed                         |
| 185                                                                                               | mk2 → creb              | tgfa → creb (unknown mechanism) |
| 187                                                                                               | !p90rsk · !akt → gsk3   | !pkc → gsk3                     |
| <b>Additional interactions</b>                                                                    |                         |                                 |
| pi3k → jnk (unknown mechanism)                                                                    |                         |                                 |
| mtor_rap → p70s6_1 (excluded in logical analysis; in addition to reactions 143/144 in Table S1.2) |                         |                                 |
