# Supplementary material for: The Logic of EGFR/ErbB Signaling: Theoretical Properties and Analysis of High-Throughput Data
Source: PLOS journal article supplement (doi:10.1371/journal.pcbi.1000438), 2009-08-06

**Figure S2. Sensitivities of the binarization to the chosen parameters.**

**2.1** Primary human hepatocytes (data obtained from Alexopoulos et al (in preparation));  
**2.2** HepG2 cells (the horizontal line indicates the first (top) and the second (bottom) measurement set for HepG2 cells);

Parameter 1 (2.1a, 2.2a): the ratio between the value at time 1 and the value at time 0 lies beneath (red) or above (green) the fixed threshold  $p1=1.5$ ;  
Parameter 2 (2.1b, 2.2b): the ratio between the signal and the maximum value for this signal from all measurements lies beneath (red) or above (green) the fixed threshold  $p2=0.15$ ;  
Parameter 3 (2.1c, 2.2c): the signal lies beneath (red) or above (green) the fixed threshold for experimental noise ( $p3=100$ ).  
For all parameters: The darker a field is colored, the larger is the distance to the chosen threshold, i.e. the binarization is less sensitive on the parameter.

**2.1a)**

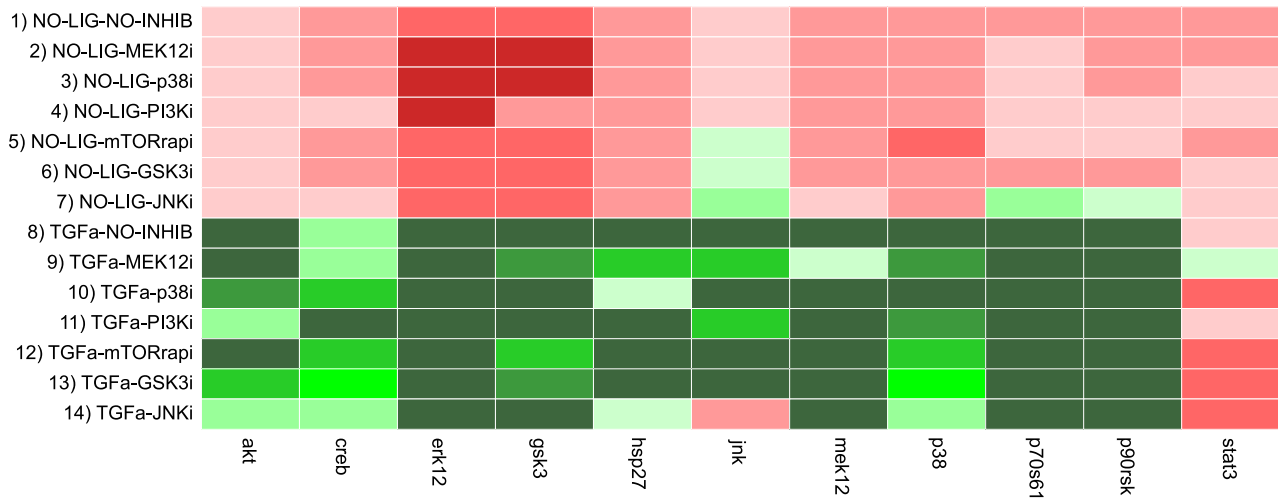

**2.1b)**

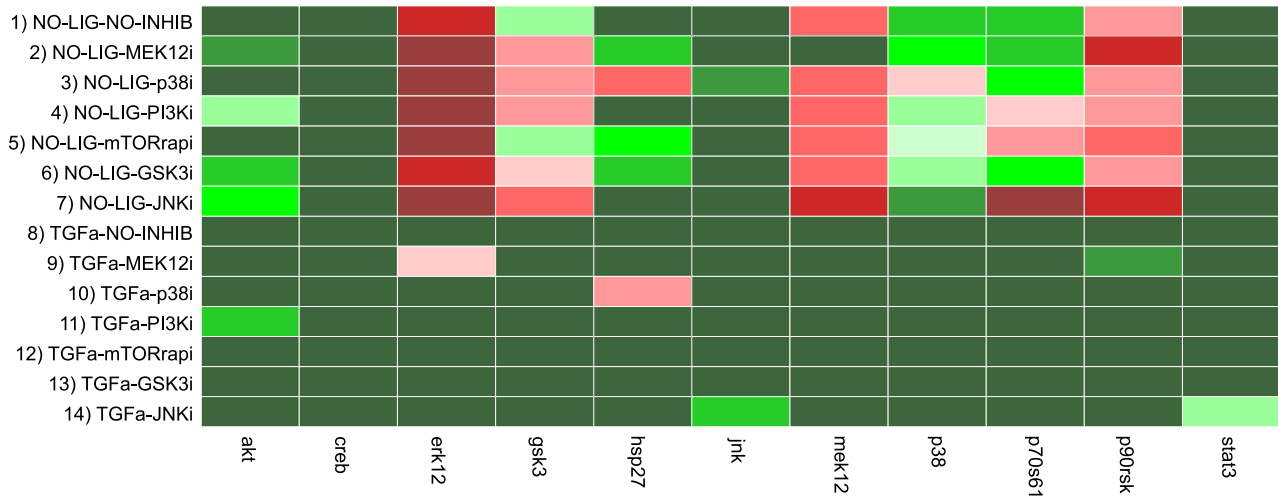

**2.1c)**

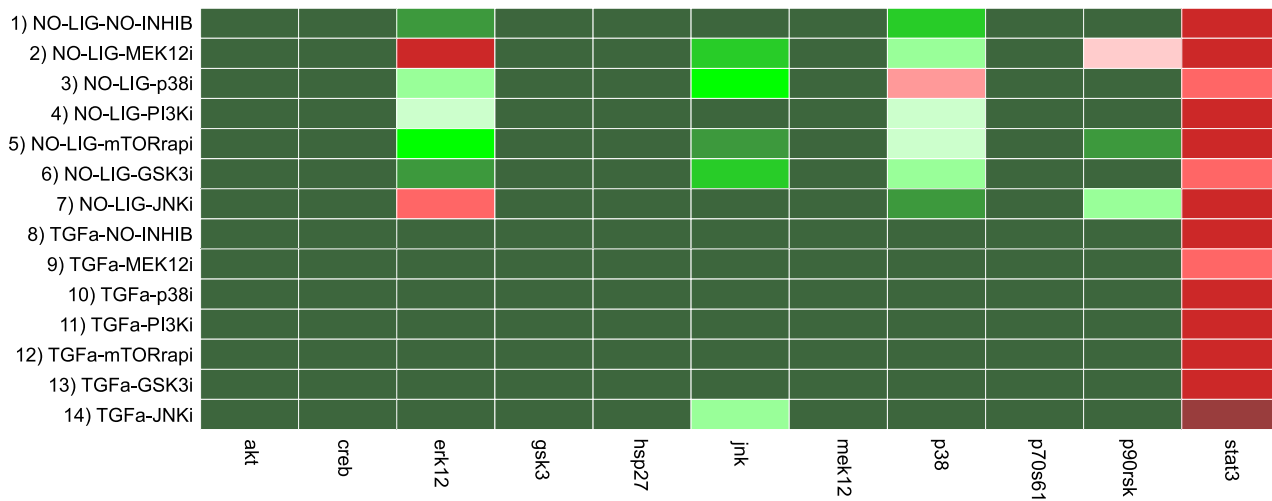

**2.2a)**

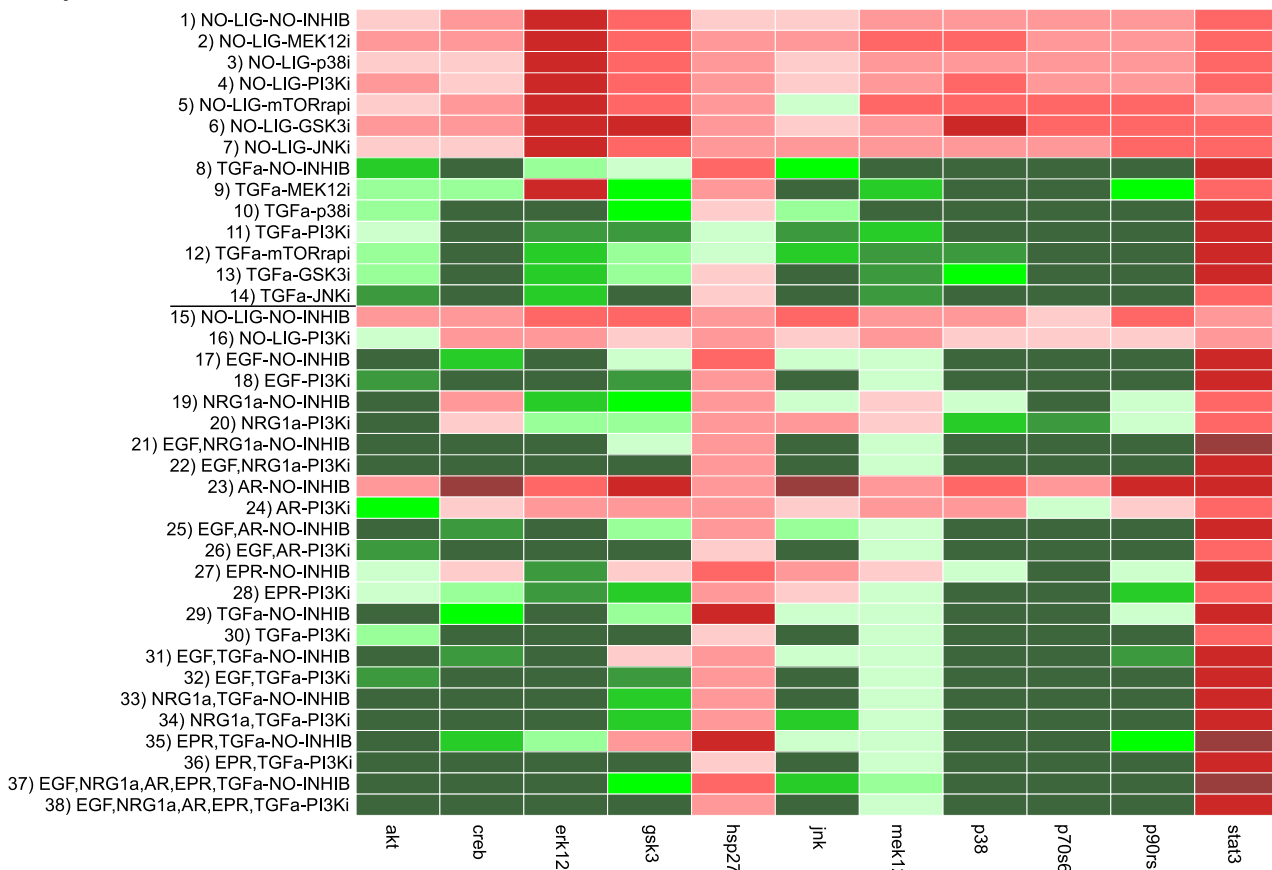

2.2b)

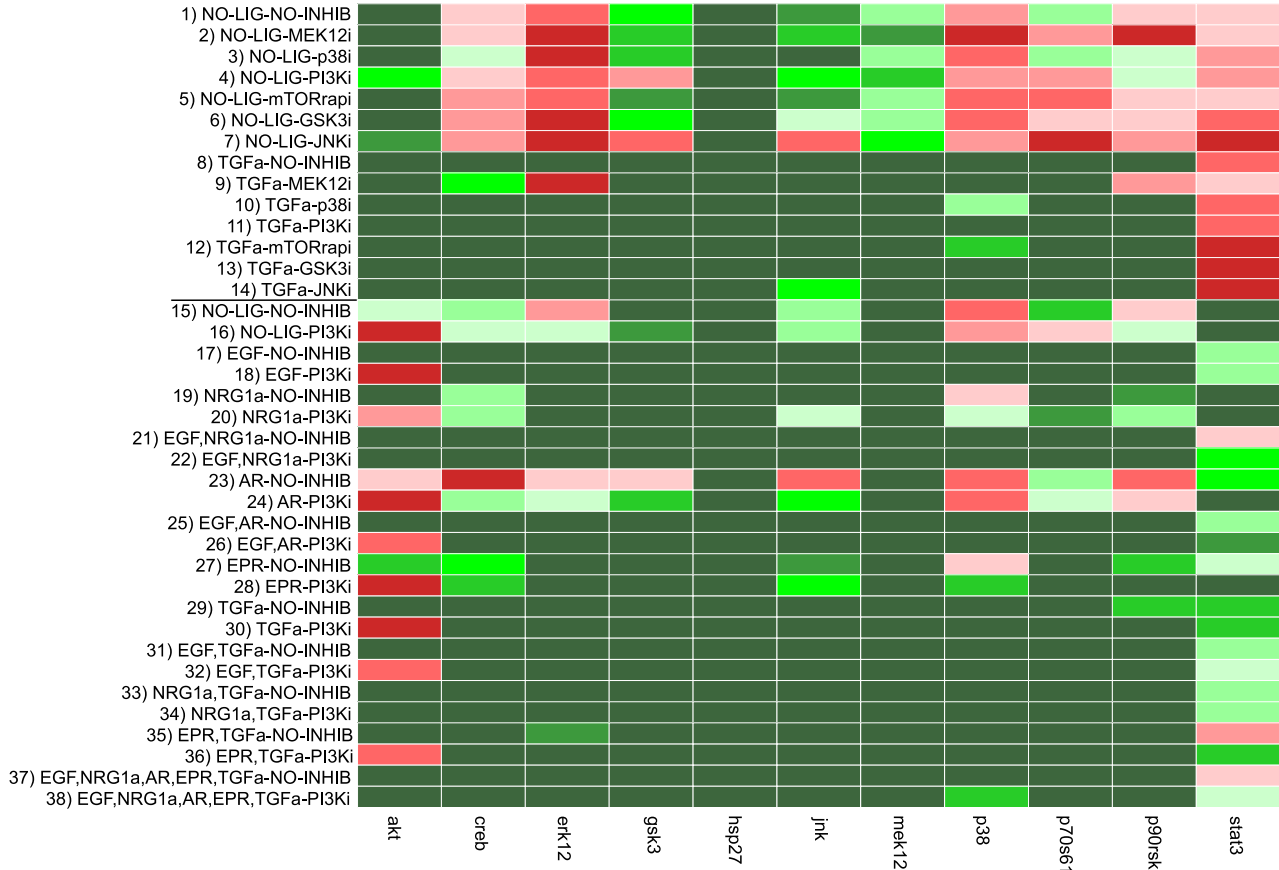

2.2c)

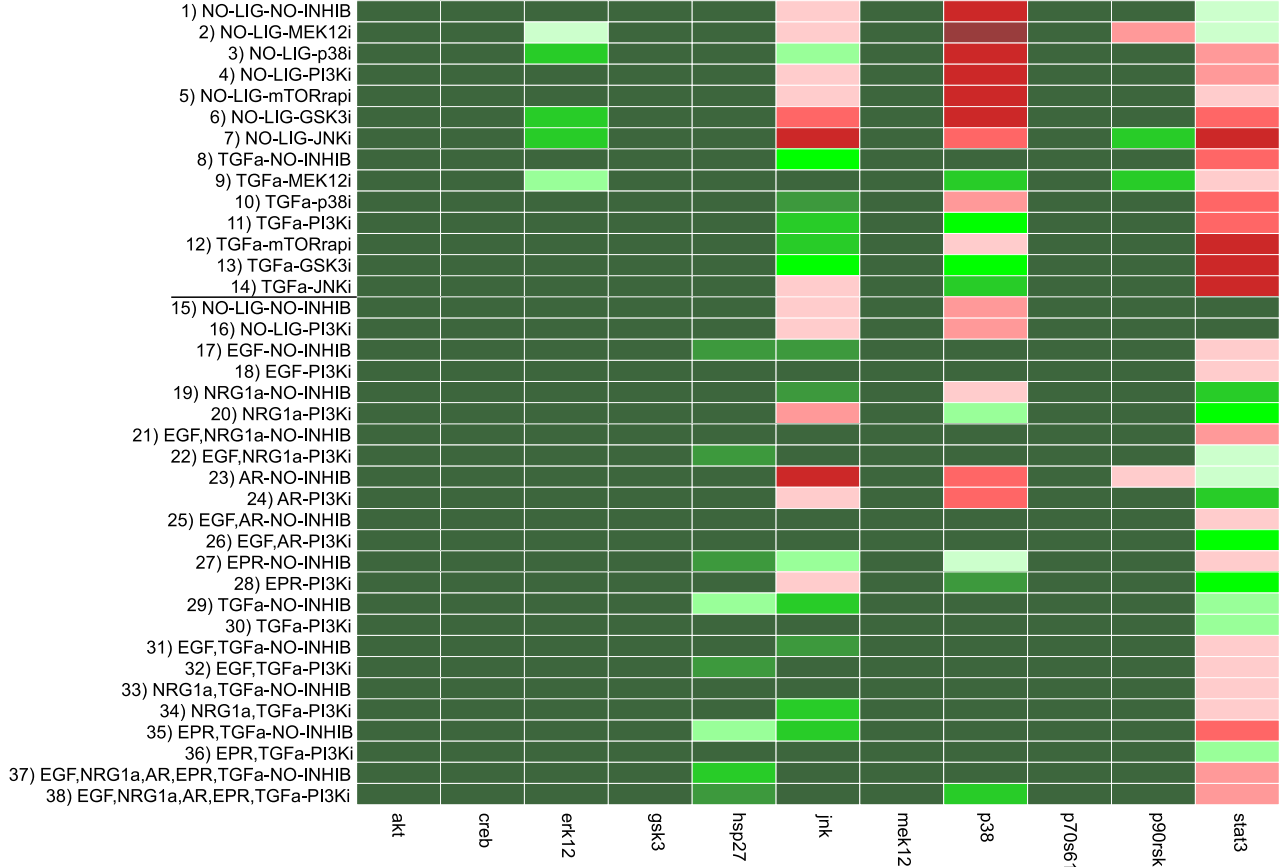

Supplement: S2 (10.1371/journal.pcbi.1000438.s002) [file journal.pcbi.1000438.s002]
